# Supplementary material for: Unique S-scheme heterojunctions in self-assembled TiO2/CsPbBr3 hybrids for CO2 photoreduction
Source: PubMed Central journal article supplement (PMC7490390; doi:10.1038/s41467-020-18350-7), 2020-09-14
Supplement: 41467_2020_18350_MOESM1_ESM.pdf [file 41467_2020_18350_MOESM1_ESM.pdf]

## **Supplementary Information**

### **Unique S-scheme heterojunctions in self-assembled TiO<sub>2</sub>/CsPbBr<sub>3</sub> hybrids for CO<sub>2</sub> photoreduction**

*Xu et al.*

## Supplementary Figures

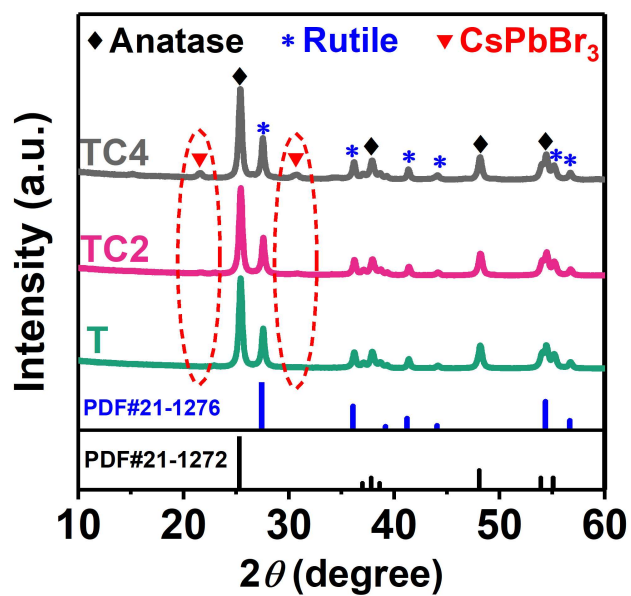

**Supplementary Figure 1.** X-ray diffraction (XRD) patterns of T, TC2 and TC4. TC<sub>x</sub> represents the TiO<sub>2</sub>/CsPbBr<sub>3</sub> hybrids, where T and C denote TiO<sub>2</sub> and CsPbBr<sub>3</sub> QDs, respectively;  $x$  represents the weight percentage of CsPbBr<sub>3</sub> with respect to TiO<sub>2</sub>.

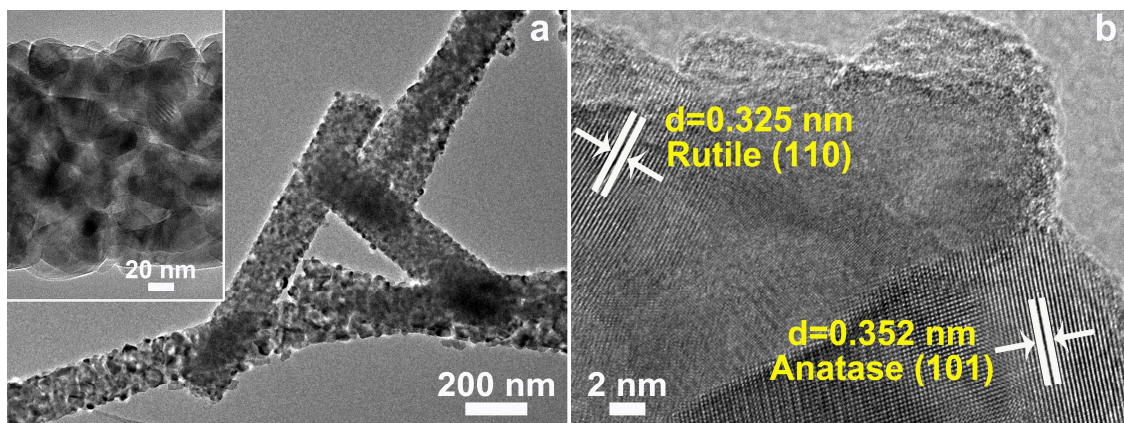

**Supplementary Figure 2. Morphology of TiO<sub>2</sub> nanofibers. a** TEM image, inset on upper left is the corresponding high-magnification TEM image. **b** HRTEM image.

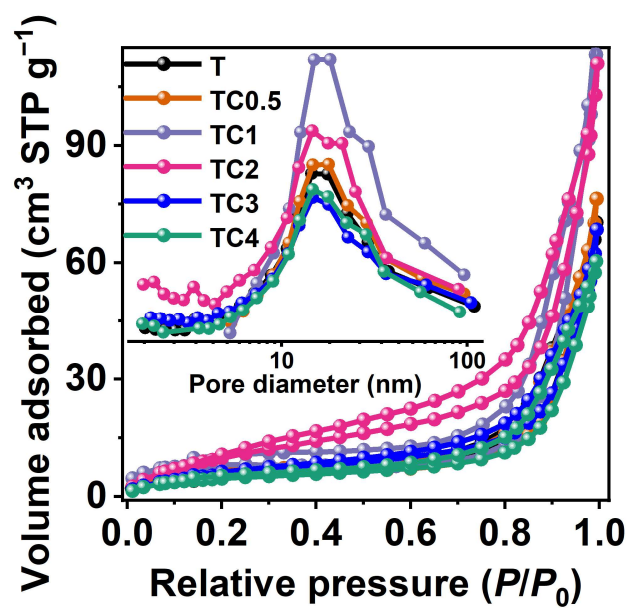

**Supplementary Figure 3. Nitrogen adsorption-desorption isotherm and the corresponding pore size distribution (inset) of T, TC0.5, TC1, TC2, TC3 and TC4. TC $x$  represents the TiO<sub>2</sub>/CsPbBr<sub>3</sub> hybrids, where T and C denote TiO<sub>2</sub> and CsPbBr<sub>3</sub> QDs, respectively;  $x$  represents the weight percentage of CsPbBr<sub>3</sub> with respect to TiO<sub>2</sub>.**

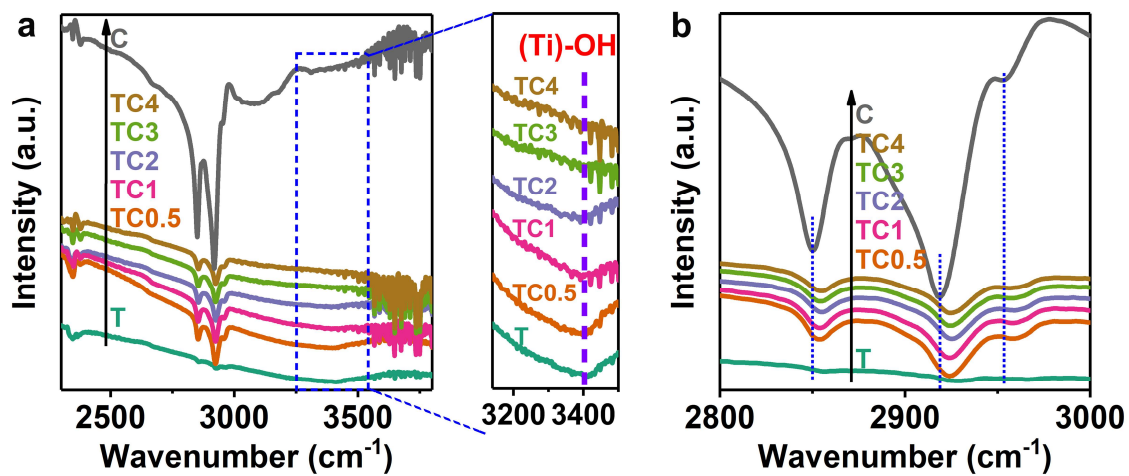

**Supplementary Figure 4. Fourier transform infrared (FTIR) spectra of T, TC<sub>x</sub> and C.**

**a** The wavenumber ranges from 2300 to 3600  $\text{cm}^{-1}$ . **b** The wavenumber ranges from 2800 to 3000  $\text{cm}^{-1}$ . TC<sub>x</sub> represents the  $\text{TiO}_2/\text{CsPbBr}_3$  hybrids, where T and C denote  $\text{TiO}_2$  and  $\text{CsPbBr}_3$  QDs, respectively;  $x$  represents the weight percentage of  $\text{CsPbBr}_3$  with respect to  $\text{TiO}_2$ .

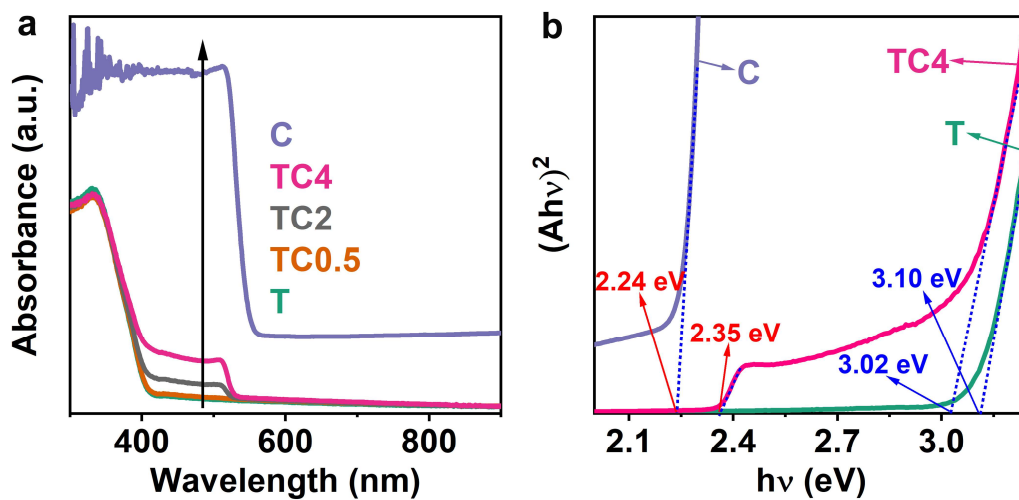

**Supplementary Figure 5. Optical properties of resultant samples.** **a** UV-vis diffuse reflectance spectra of T, TC0.5, TC2, TC4 and C. **b** Kubelka–Munk energy curve plots of T, TC4 and C. TC $x$  represents the TiO<sub>2</sub>/CsPbBr<sub>3</sub> hybrids, where T and C denote TiO<sub>2</sub> and CsPbBr<sub>3</sub> QDs, respectively;  $x$  represents the weight percentage of CsPbBr<sub>3</sub> with respect to TiO<sub>2</sub>.

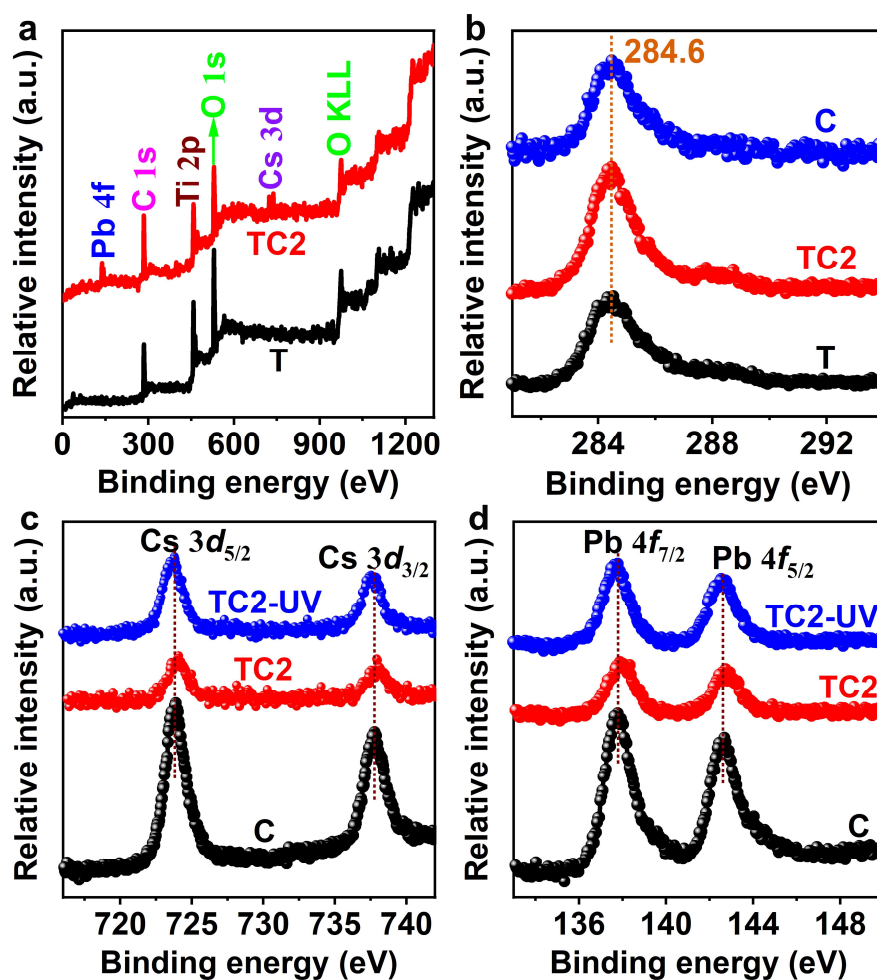

**Supplementary Figure 6. X-ray photoelectron spectroscopy (XPS) spectra of resultant samples.** **a** The survey XPS spectra of T and TC2. **b** *Ex-situ* XPS spectra of C 1s of T, TC2 and C. *In-situ* and *ex-situ* XPS spectra **c** Cs 3d and **d** Pb 4f of T, TC2 and C. *In-situ* XPS spectra were recorded under UV-vis light irradiation. TC2 represents the TiO<sub>2</sub>/CsPbBr<sub>3</sub> hybrid, where T and C denote TiO<sub>2</sub> and CsPbBr<sub>3</sub> QDs, respectively; 2 represents the weight percentage of CsPbBr<sub>3</sub> with respect to TiO<sub>2</sub>.

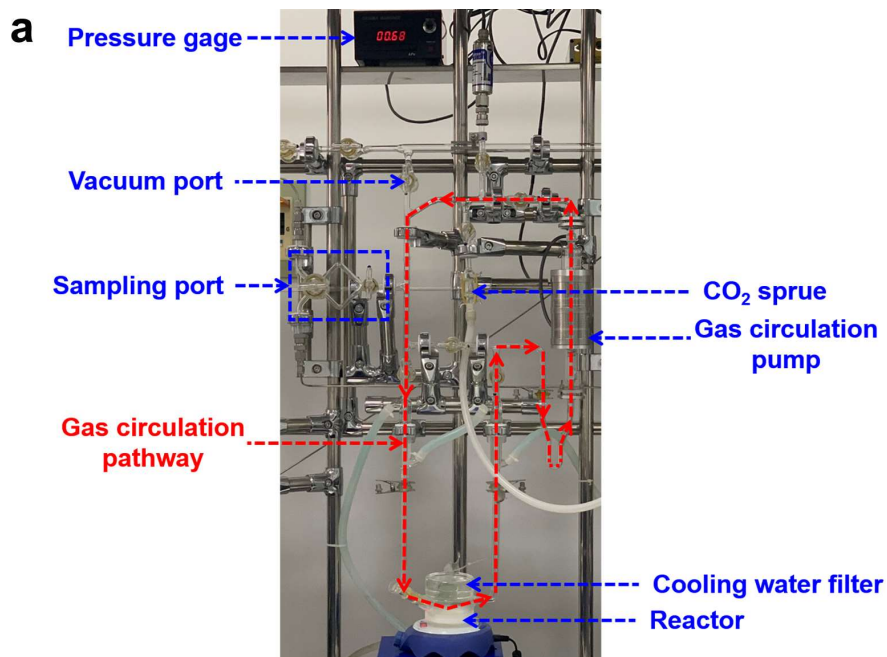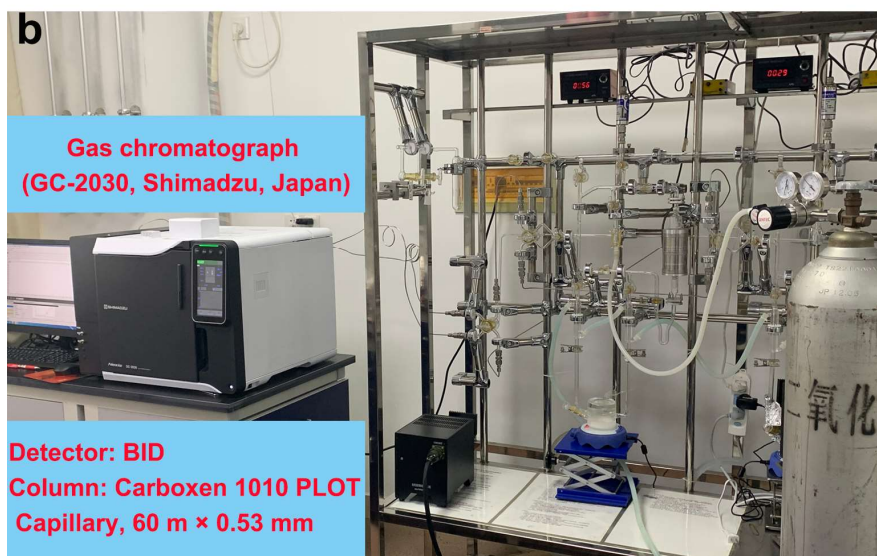

**Supplementary Figure 7. The closed gas circulation system for photocatalytic CO<sub>2</sub> reduction reaction. a** The gas circulation pathway during the CO<sub>2</sub> photoreduction. **b** The whole online closed gas circulation system.



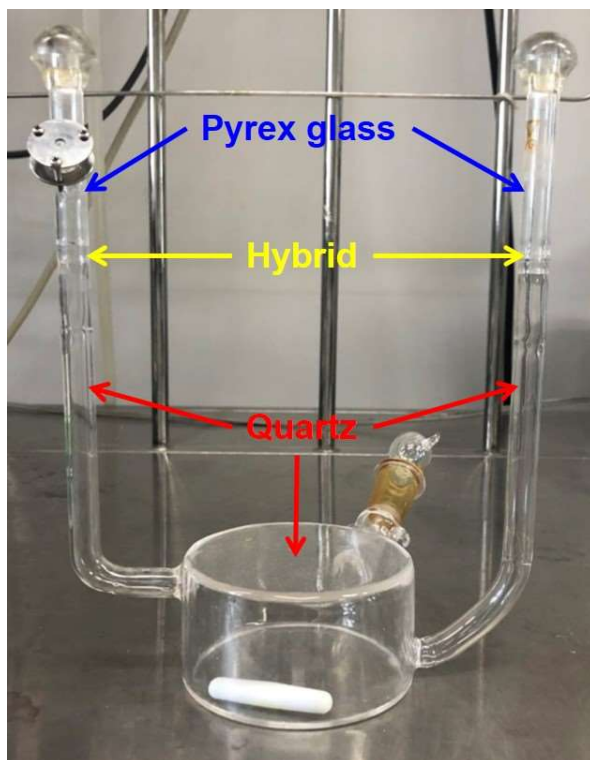

**Supplementary Figure 8.** The Quartz and Pyrex glass hybrid reaction cell for photocatalytic CO<sub>2</sub> conversion.

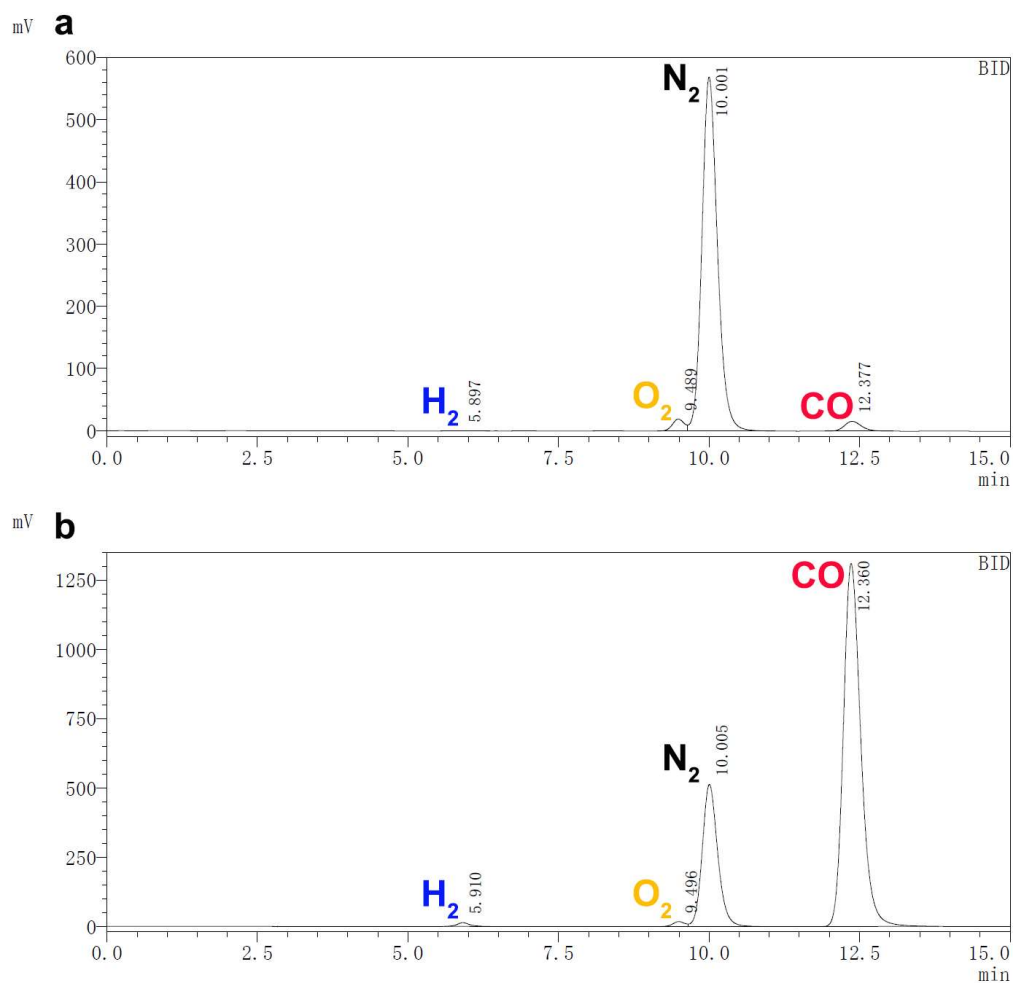

**Supplementary Figure 9. The original chromatograms for the reduction of CO<sub>2</sub> on sample TC2. a** Without [Ru<sup>II</sup>(bpy)<sub>3</sub>]Cl<sub>2</sub>·6H<sub>2</sub>O and BIH. **b** With [Ru<sup>II</sup>(bpy)<sub>3</sub>]Cl<sub>2</sub>·6H<sub>2</sub>O and BIH. TC2 represents the TiO<sub>2</sub>/CsPbBr<sub>3</sub> hybrid, where T and C denote TiO<sub>2</sub> and CsPbBr<sub>3</sub> QDs, respectively; 2 represents the weight percentage of CsPbBr<sub>3</sub> with respect to TiO<sub>2</sub>.

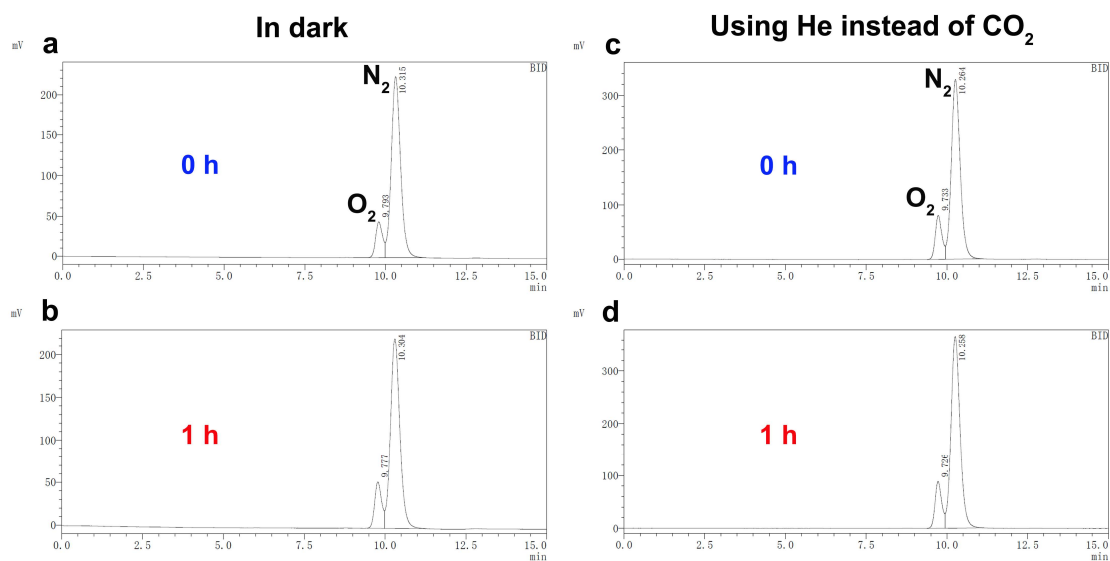

**Supplementary Figure 10. The original chromatograms of TC2. a, b In dark; c, d Using He instead of  $CO_2$  before and after 1 h irradiation. TC2 represents the  $TiO_2/CsPbBr_3$  hybrid, where T and C denote  $TiO_2$  and  $CsPbBr_3$  QDs, respectively; 2 represents the weight percentage of  $CsPbBr_3$  with respect to  $TiO_2$ .**

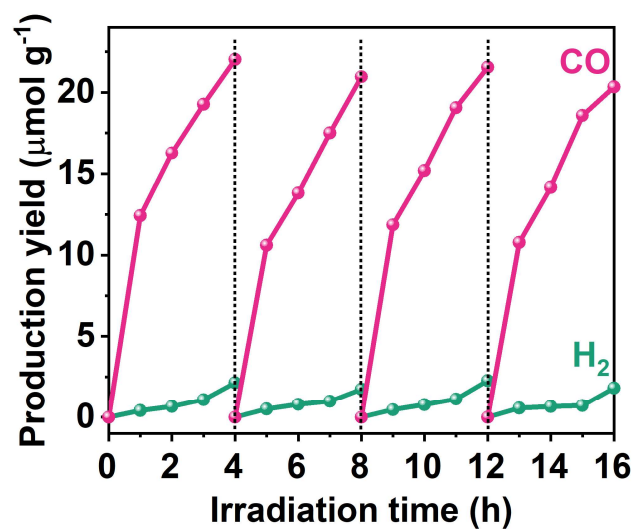

**Supplementary Figure 11.** The recyclability of TC2 for the photocatalytic CO<sub>2</sub> reduction reaction. TC2 represents the TiO<sub>2</sub>/CsPbBr<sub>3</sub> hybrid, where T and C denote TiO<sub>2</sub> and CsPbBr<sub>3</sub> QDs, respectively; 2 represents the weight percentage of CsPbBr<sub>3</sub> with respect to TiO<sub>2</sub>.

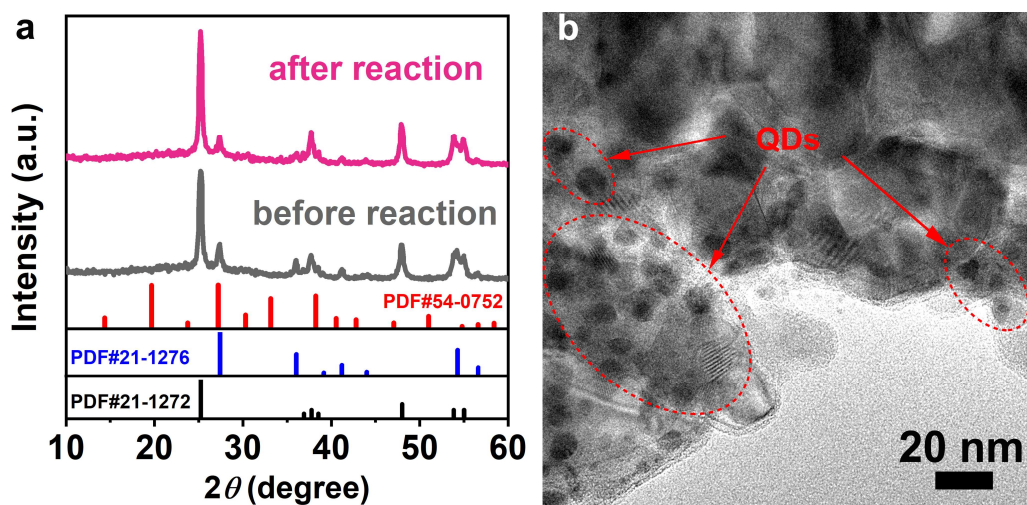

**Supplementary Figure 12. Evaluation of the photostability of TC2.** **a** XRD patterns of TC2 before and after reaction. **b** TEM image of TC2 after photocatalytic reaction. TC2 represents the  $\text{TiO}_2/\text{CsPbBr}_3$  hybrid, where T and C denote  $\text{TiO}_2$  and  $\text{CsPbBr}_3$  QDs, respectively; 2 represents the weight percentage of  $\text{CsPbBr}_3$  with respect to  $\text{TiO}_2$ .

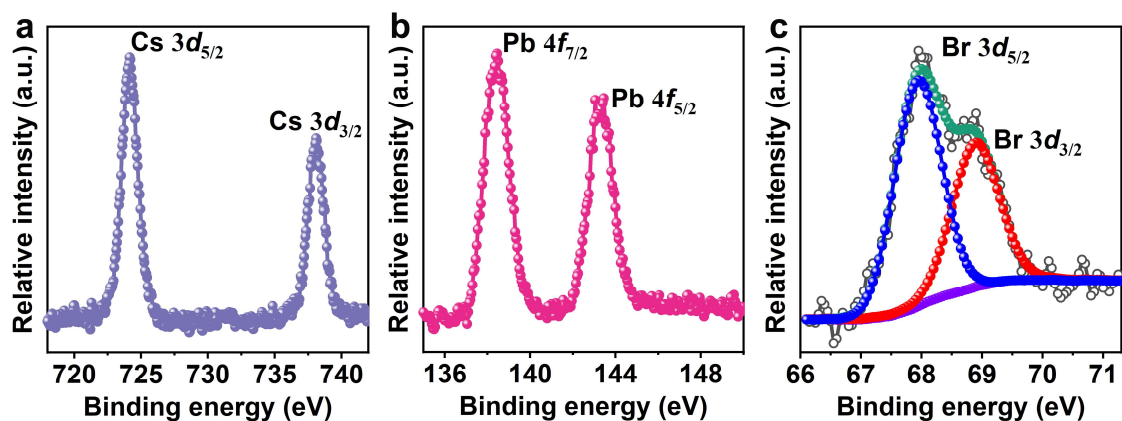

**Supplementary Figure 13.** *Ex-situ* XPS spectra of **a** Cs 3d, **b** Pb 4f and **c** Br 3d of TC2 after photocatalytic reaction. TC2 represents the TiO<sub>2</sub>/CsPbBr<sub>3</sub> hybrid, where T and C denote TiO<sub>2</sub> and CsPbBr<sub>3</sub> QDs, respectively; 2 represents the weight percentage of CsPbBr<sub>3</sub> with respect to TiO<sub>2</sub>.

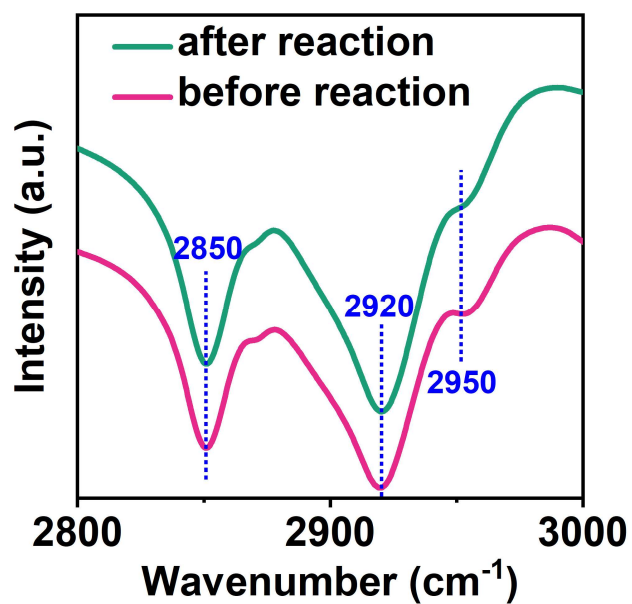

**Supplementary Figure 14.** The FTIR spectra of TC2 before and after photocatalytic reaction. TC2 represents the TiO<sub>2</sub>/CsPbBr<sub>3</sub> hybrid, where T and C denote TiO<sub>2</sub> and CsPbBr<sub>3</sub> QDs, respectively; 2 represents the weight percentage of CsPbBr<sub>3</sub> with respect to TiO<sub>2</sub>.

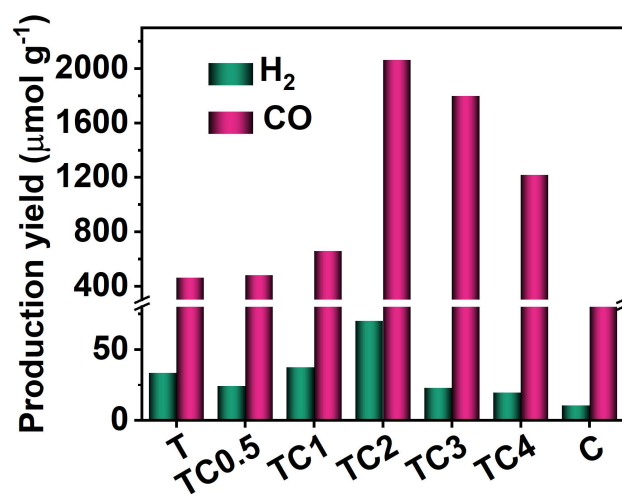

**Supplementary Figure 15. Photocatalytic activities of CO<sub>2</sub> reduction** over T, TC<sub>x</sub> and C with the help of [Ru<sup>II</sup>(bpy)<sub>3</sub>]Cl<sub>2</sub>·6H<sub>2</sub>O and BIH. TC<sub>x</sub> represents the TiO<sub>2</sub>/CsPbBr<sub>3</sub> hybrids, where T and C denote TiO<sub>2</sub> and CsPbBr<sub>3</sub> QDs, respectively; *x* represents the weight percentage of CsPbBr<sub>3</sub> with respect to TiO<sub>2</sub>.



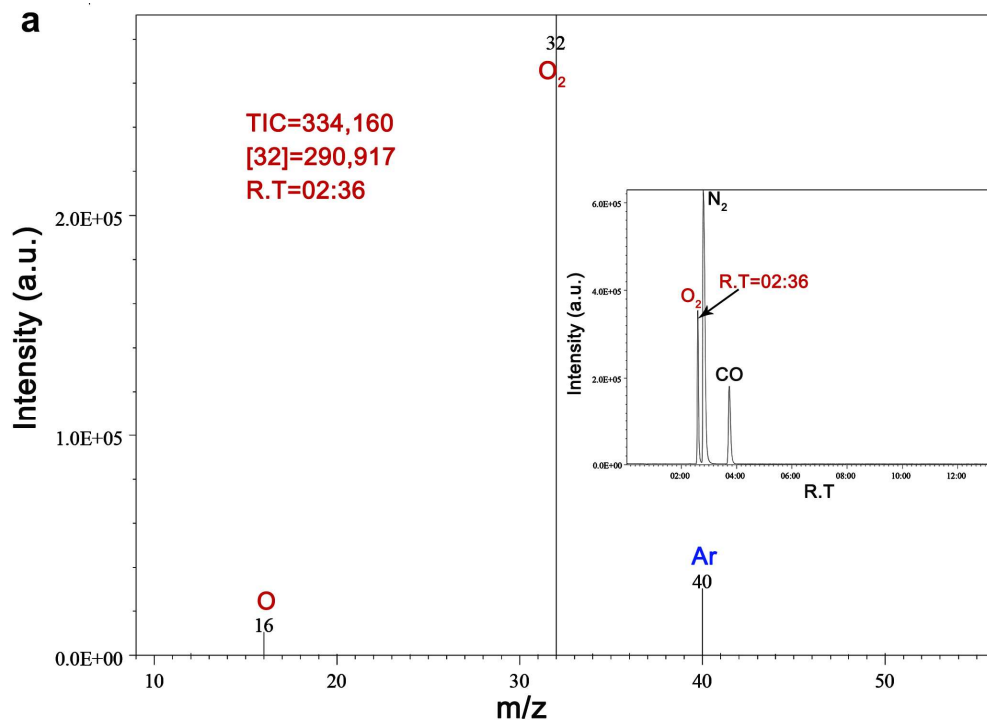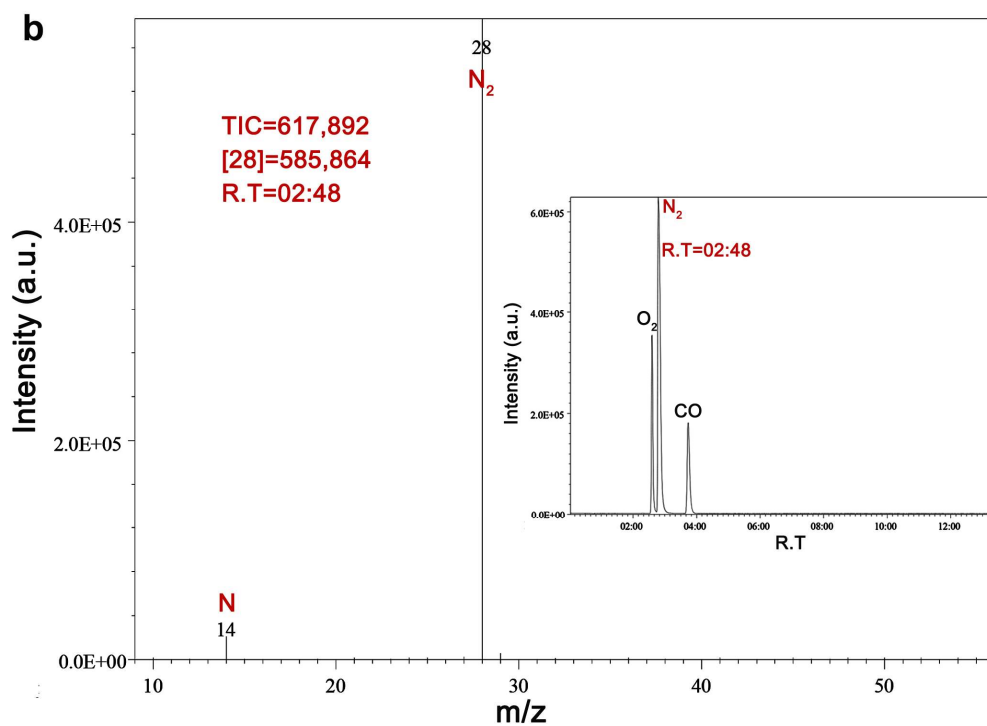

**Supplementary Figure 16. Mass spectra and total ion chromatography (inset) of a  $O_2$ ,  
b  $N_2$  over  $TiO_2/CsPbBr_3$  heterojunction in the photocatalytic reduction of  $^{13}CO_2$ .**

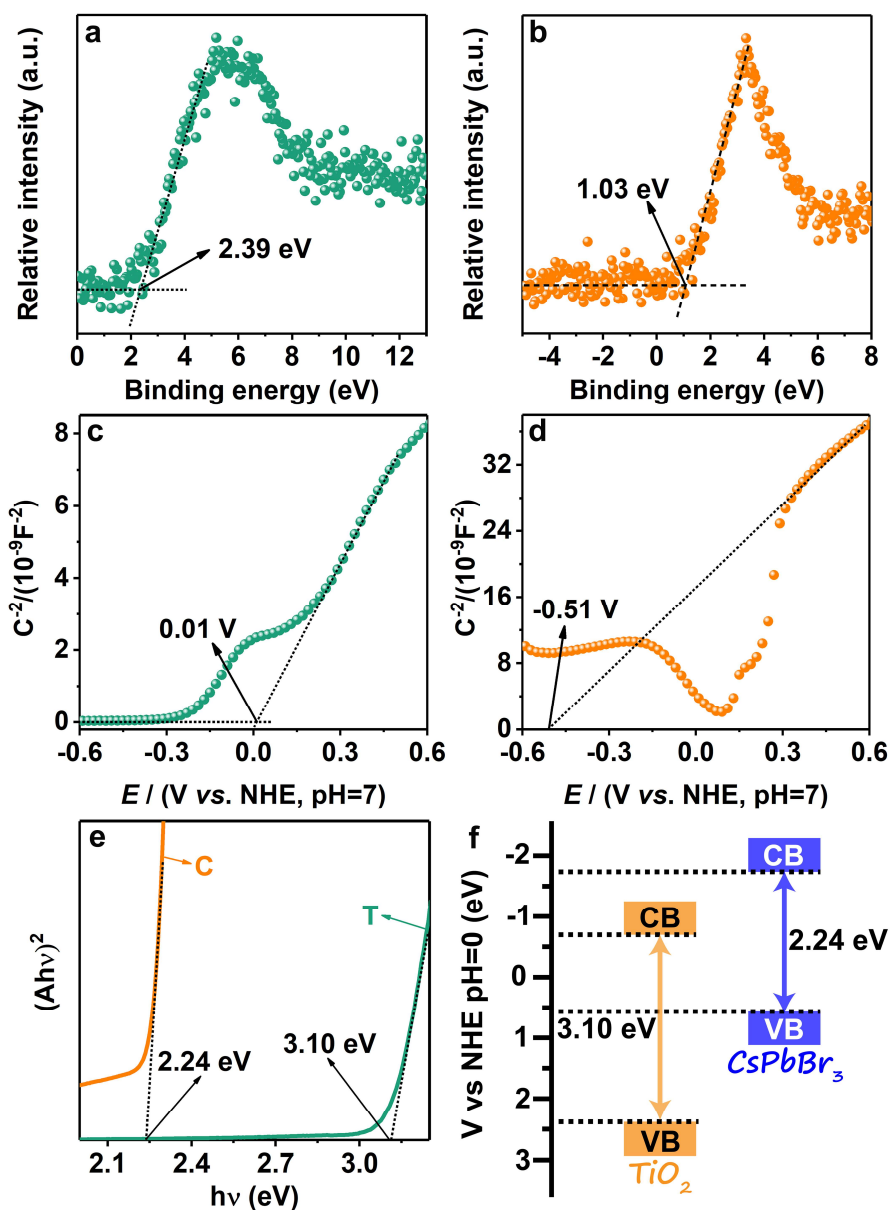

**Supplementary Figure 17.** Band structures of  $\text{TiO}_2$  and  $\text{CsPbBr}_3$  QDs. Valence band (VB) XPS spectra of **a**  $\text{TiO}_2$  and **b**  $\text{CsPbBr}_3$  QDs. Mott-Schottky plots of **c**  $\text{TiO}_2$  and **d**  $\text{CsPbBr}_3$  QDs. **e** Kubelka–Munk energy curve plots of  $\text{TiO}_2$  and  $\text{CsPbBr}_3$  QDs. **f** Band structures of the composite photocatalyst.

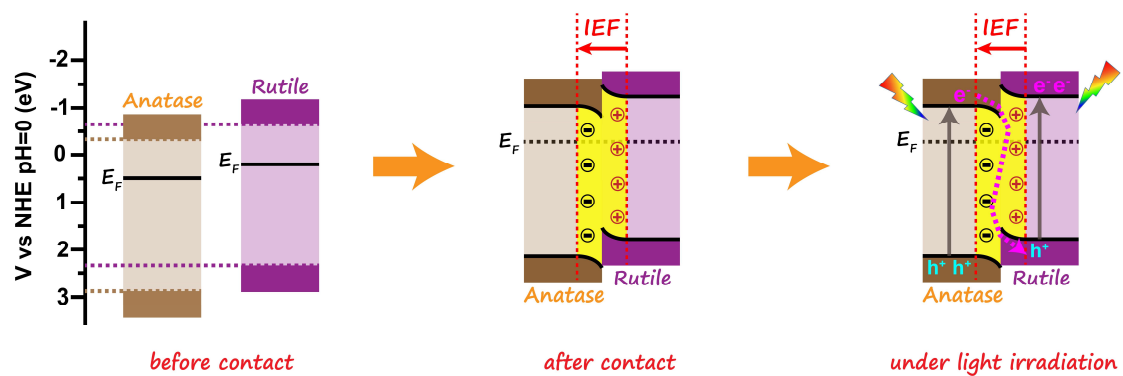

**Supplementary Figure 18. Schematic illustration of anatase/rutile homojunction:**

internal electric field-induced charge transfer, separation and the formation of S-scheme

heterojunction under UV-visible light irradiation.

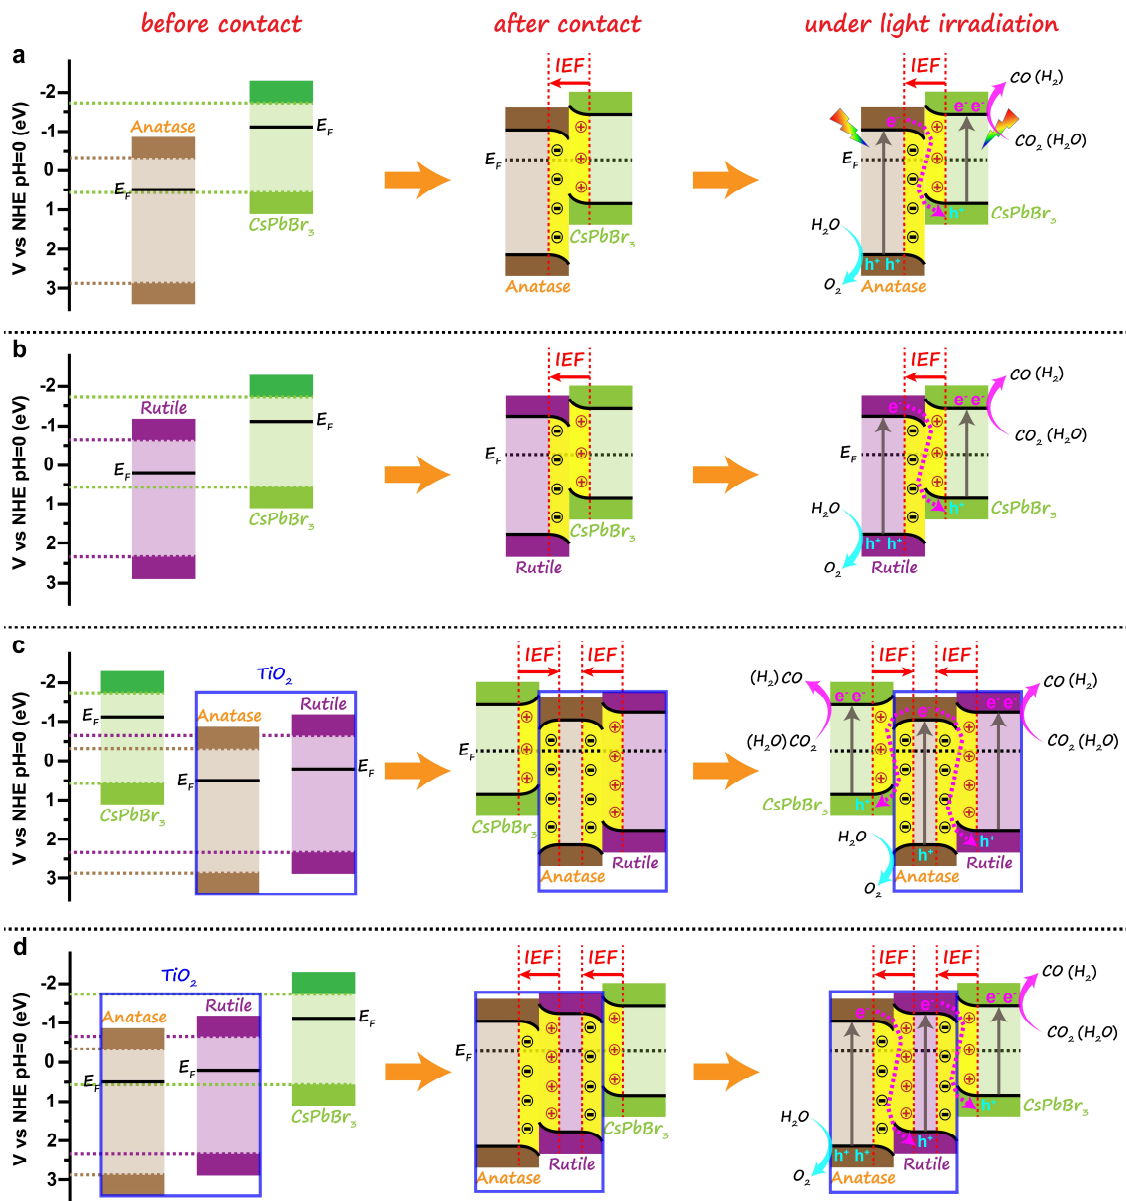

**Supplementary Figure 19. Possible schematic illustrations of TiO<sub>2</sub>/CsPbBr<sub>3</sub> heterojunction. a** CsPbBr<sub>3</sub> QDs contacted with anatase TiO<sub>2</sub>, **b** CsPbBr<sub>3</sub> QDs contacted with rutile TiO<sub>2</sub>, **c** CsPbBr<sub>3</sub> QDs contacted with anatase TiO<sub>2</sub> and anatase TiO<sub>2</sub> contacted with rutile TiO<sub>2</sub>, **d** CsPbBr<sub>3</sub> QDs contacted with rutile TiO<sub>2</sub> and rutile TiO<sub>2</sub> contacted with anatase TiO<sub>2</sub>.

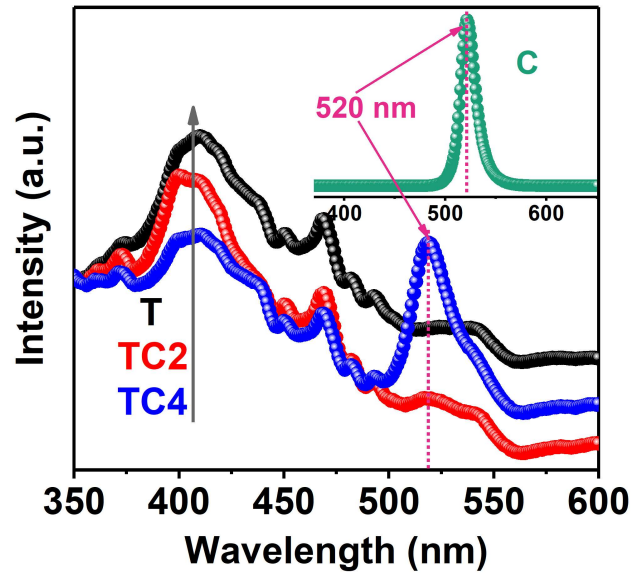

**Supplementary Figure 20.** Photoluminescence (PL) spectra of T, TC2, TC4 and C. TC<sub>x</sub> represents the TiO<sub>2</sub>/CsPbBr<sub>3</sub> hybrids, where T and C denote TiO<sub>2</sub> and CsPbBr<sub>3</sub> QDs, respectively; *x* represents the weight percentage of CsPbBr<sub>3</sub> with respect to TiO<sub>2</sub>.

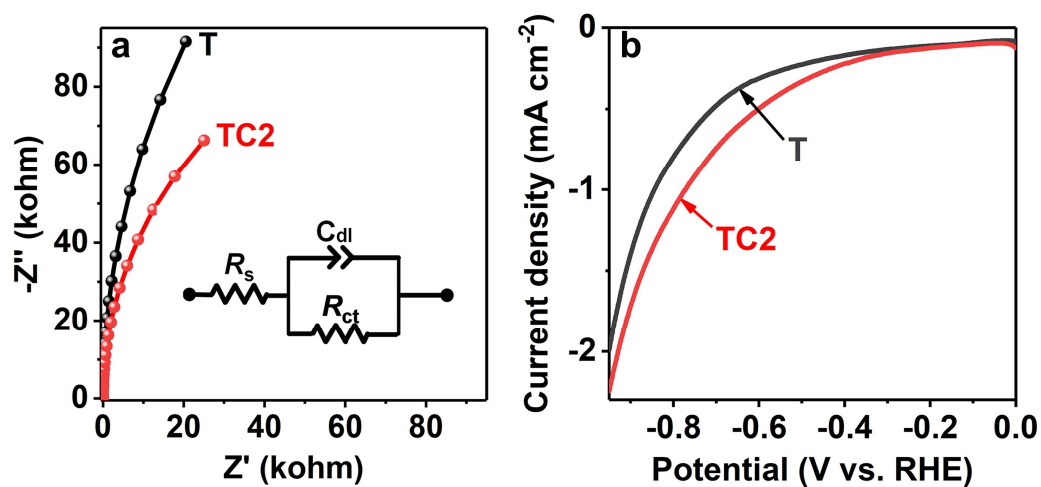

**Supplementary Figure 21. Electrochemical Characterization.** **a** Nyquist plots of T and TC2 in 0.5 M Na<sub>2</sub>SO<sub>4</sub> aqueous solution. **b** Polarization curves of T and TC2 at a scan rate of 5 mV s<sup>-1</sup> in 0.5 M Na<sub>2</sub>SO<sub>4</sub> under UV-visible light irradiation. TC2 represents the TiO<sub>2</sub>/CsPbBr<sub>3</sub> hybrid, where T and C denote TiO<sub>2</sub> and CsPbBr<sub>3</sub> QDs, respectively; 2 represents the weight percentage of CsPbBr<sub>3</sub> with respect to TiO<sub>2</sub>.

## Supplementary Tables

**Supplementary Table 1.** Physical properties of the samples with different CsPbBr<sub>3</sub> QDs loadings. TC $x$  represents the TiO<sub>2</sub>/CsPbBr<sub>3</sub> hybrids, where T and C denote TiO<sub>2</sub> and CsPbBr<sub>3</sub> QDs, respectively;  $x$  represents the weight percentage of CsPbBr<sub>3</sub> with respect to TiO<sub>2</sub>.

| Samples | $S_{\text{BET}}$<br>(m <sup>2</sup> g <sup>-1</sup> ) | $V_{\text{p}}$<br>(m <sup>3</sup> g <sup>-1</sup> ) | $d_{\text{p}}$<br>(nm) |
|---------|-------------------------------------------------------|-----------------------------------------------------|------------------------|
| T       | 19                                                    | 0.09                                                | 17.6                   |
| TC0.5   | 21                                                    | 0.09                                                | 18.4                   |
| TC1     | 28                                                    | 0.14                                                | 20.2                   |
| TC2     | 42                                                    | 0.15                                                | 17.1                   |
| TC3     | 22                                                    | 0.08                                                | 14.5                   |
| TC4     | 18                                                    | 0.07                                                | 13.0                   |

$S_{\text{BET}}$ : specific surface area,  $V_{\text{p}}$ : pore volume,  $d_{\text{p}}$ : average pore size

**Supplementary Table 2.** H<sub>2</sub> and CO production yields over TC2 after UV-vis light irradiation for one hour of various controlled experiments. TC2 represents the TiO<sub>2</sub>/CsPbBr<sub>3</sub> hybrid, where T and C denote TiO<sub>2</sub> and CsPbBr<sub>3</sub> QDs, respectively; 2 represents the weight percentage of CsPbBr<sub>3</sub> with respect to TiO<sub>2</sub>.

|     | H <sub>2</sub> (μmol) | CO (μmol)      |
|-----|-----------------------|----------------|
| [a] | 0.004                 | 0.13           |
| [b] | 0.70                  | 20.65          |
| [c] | 0.04                  | 4.81           |
| [d] | Not determined        | Not determined |
| [e] | Not determined        | Not determined |
| [f] | 0.013                 | 0.045          |
| [g] | 0.003                 | 0.026          |

[a]: 10 mg catalyst+30 mL acetonitrile+100 μL H<sub>2</sub>O;

[b]: 10 mg catalyst+2 mM [Ru<sup>II</sup>(bpy)<sub>3</sub>]Cl<sub>2</sub>·6H<sub>2</sub>O+10 mM BIH+30 mL acetonitrile+100 μL H<sub>2</sub>O;

[c]: 2 mM [Ru<sup>II</sup>(bpy)<sub>3</sub>]Cl<sub>2</sub>·6H<sub>2</sub>O+10 mM BIH+30 mL acetonitrile+100 μL H<sub>2</sub>O;

[d]: in dark;

[e]: using He instead of CO<sub>2</sub>;

[f]: 10 mg catalyst+10 mM BIH+30 mL acetonitrile+100 μL H<sub>2</sub>O;

[g]: 10 mg catalyst+2 mM [Ru<sup>II</sup>(bpy)<sub>3</sub>]Cl<sub>2</sub>·6H<sub>2</sub>O+30 mL acetonitrile+100 μL H<sub>2</sub>O.



**Supplementary Table 3.** The fitted parameters obtained from decay curves of the samples.

TC2 represents the TiO<sub>2</sub>/CsPbBr<sub>3</sub> hybrid, where T and C denote TiO<sub>2</sub> and CsPbBr<sub>3</sub> QDs, respectively; 2 represents the weight percentage of CsPbBr<sub>3</sub> with respect to TiO<sub>2</sub>.

| <b>Sample</b> | $E_w$  | $\tau_1$ (ns)<br>(Rel. %) | $\tau_2$ (ns)<br>(Rel. %) | $\tau_3$ (ns)<br>(Rel. %) | $\tau_a$ (ns) | $\chi^2$ |
|---------------|--------|---------------------------|---------------------------|---------------------------|---------------|----------|
| <b>T</b>      | 450 nm | 0.56<br>(37.98)           | 2.99<br>(46.82)           | 13.80<br>(15.20)          | 1.3           | 1.01     |
| <b>TC2</b>    | 450 nm | 0.82<br>(36.27)           | 3.56<br>(51.32)           | 19.36<br>(12.41)          | 2.1           | 1.13     |
| <b>TC2</b>    | 520 nm | 1.76<br>(30.12)           | 6.40<br>(39.95)           | 40.38<br>(29.94)          | 10.4          | 1.07     |

$\tau_a$  represents the average lifetime (ns) of photogenerated carriers;  $\tau_1$ ,  $\tau_2$  and  $\tau_3$  represent the lifetime (ns) in the radiative, non-radiative and energy transfer process, respectively;  $\chi^2$  represents the goodness of fit parameter.

## Supplementary Methods

**Computational details.** The density functional theory (DFT) calculations were carried out by using the CASTEP module. The exchange–correlation interaction was described by generalized gradient approximation (GGA) with the Perdew–Burke–Ernzerhof (PBE) functional. The energy cutoff and Monkhorst–Pack **k**-point mesh were set as 450 eV and  $2 \times 2 \times 1$ , respectively. During the geometry optimization, the convergence tolerance was set as  $1.0 \times 10^{-5}$  eV atom<sup>-1</sup> for energy and 0.03 eV Å<sup>-1</sup> for force. For the construction of surface models, a vacuum of 20 Å was used to eliminate interactions between periodic structures. The work function is defined as  $\Phi = E_V - E_F$ , where  $E_V$  and  $E_F$  are the electrostatic potentials of the vacuum and Fermi levels, respectively.
